# Supplementary material for: Neonatal exposure to high oxygen levels leads to impaired ischemia-induced neovascularization in adulthood
Source: PubMed Central journal article supplement (PMC5658429; doi:10.1038/s41598-017-14396-8), 2017-10-26
Supplement: 41598_2017_14396_MOESM1_ESM.pdf [file 41598_2017_14396_MOESM1_ESM.pdf]

# Neonatal exposure to high oxygen levels leads to impaired ischemia-induced neovascularization in adulthood

Raphael Mathieu, Sylvie Dussault, Michel Desjarlais, François Rivard, Wahiba Dhahri, Anik Cloutier, Anne-Monique Nuyt and Alain Rivard

## A

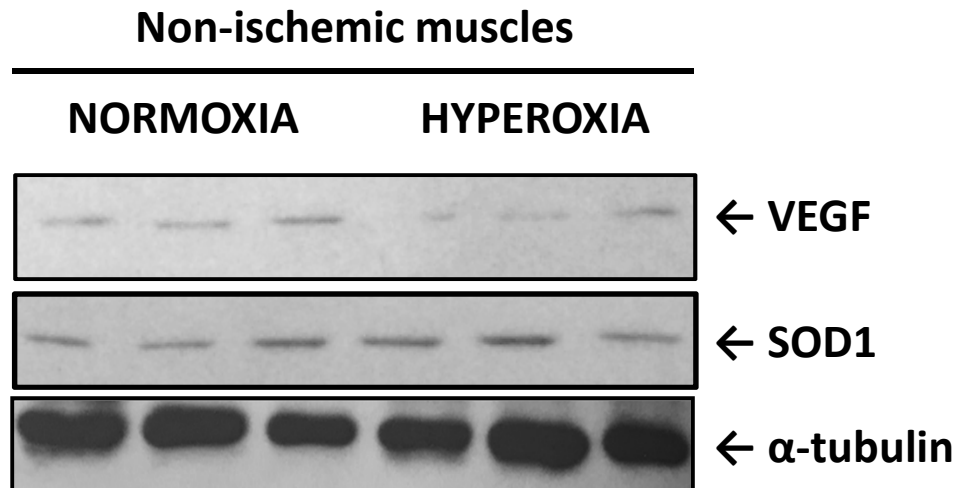

## B

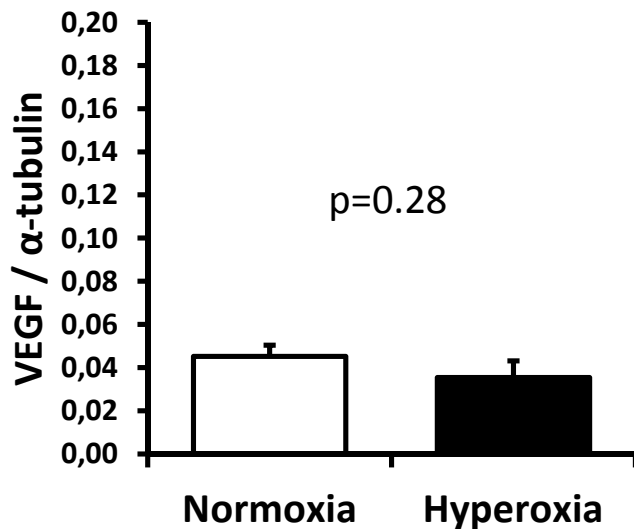

## C

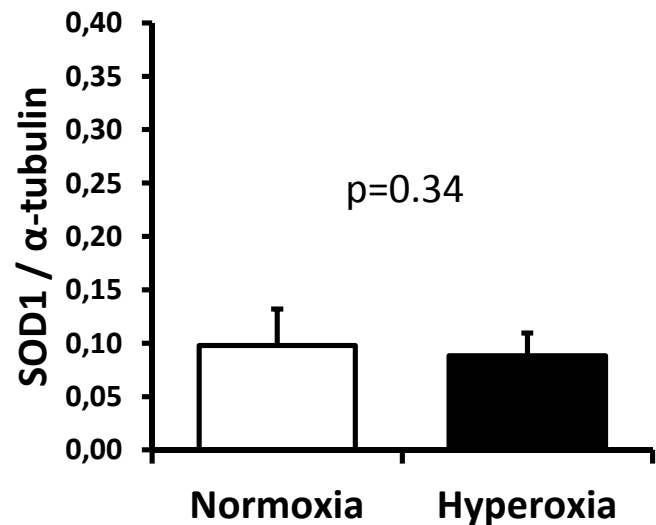

**Supplemental Figure: Effect of perinatal exposure to hyperoxia on VEGF and SOD1 expression in non-ischemic hindlimb muscles.** Representative Western blots (A) and quantification of VEGF (B) and SOD1 (C) expression in the different conditions. p=ns for both VEGF (p=0.28) and SOD1 (p=0.34).
